# Supplementary material
Source: Springer Nature journal article supplement (http://www.springermedizin.de/resource/supplementary/12891_2013_1838_MOESM6_ESM.pdf/9508590)

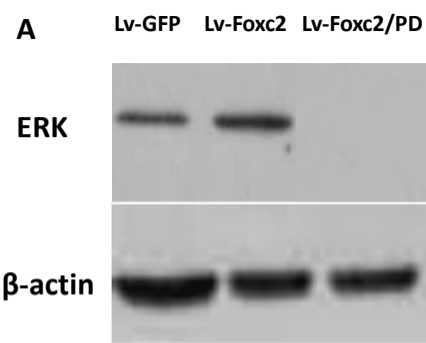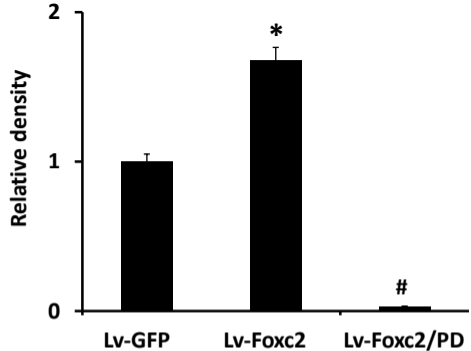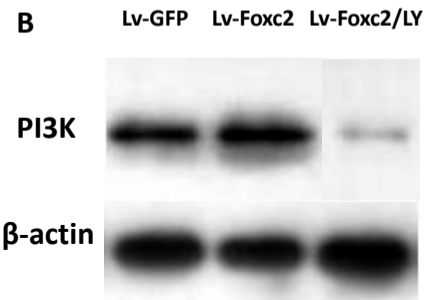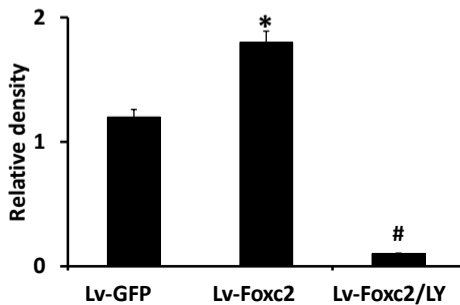

Supplement: MOESM6 [file 9508590]
